# Supplementary material for: Long non-coding RNA DLX6-AS1 facilitates bladder cancer progression through modulating miR-195-5p/VEGFA signaling pathway
Source: publisher site journal article supplement (doi:10.18632/aging.103374), 2020-08-03
Supplement: Supplementary file [file aging-v12i16-103374-supplementary-material-SD1.pdf]

**SUPPLEMENTARY FIGURE**

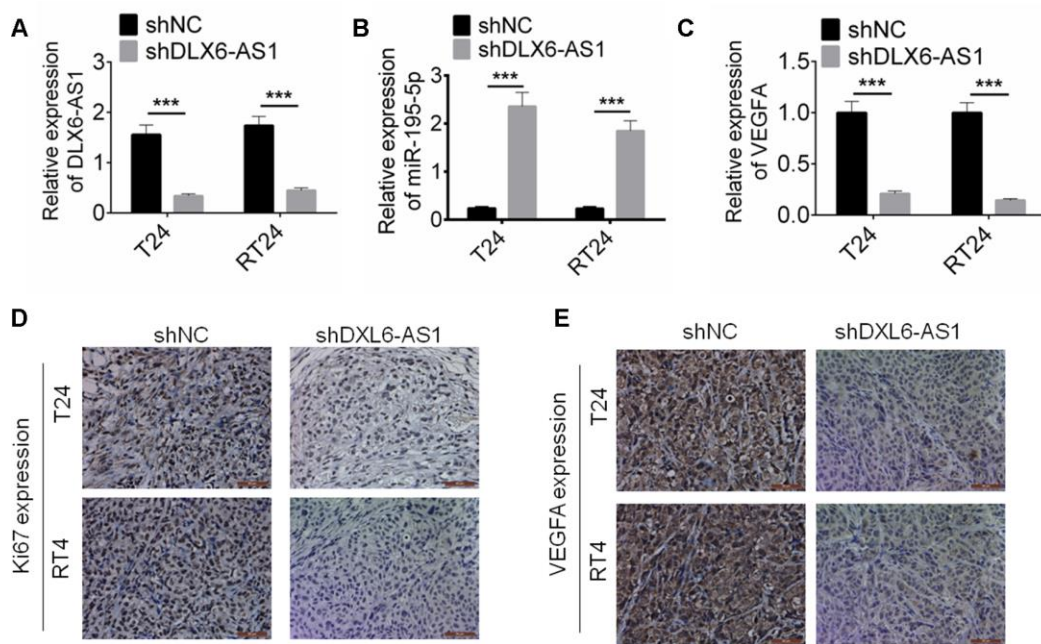

**Supplementary Figure 1. shDLX6-AS1 promotes miR-195-5p expression and inhibits VEGFA expression *in vivo*.** (A–C) The expressions of DLX6-AS1, miR-195-5p and VEGFA in the tumor tissues were examined by qRT-PCR. (D, E) The protein expressions of Ki67 and VEGFA in the tumor tissues were examined by IHC analysis. Data were expressed as the mean  $\pm$  SD. \*\*\* $P < 0.001$ .
